# Supplementary material
Source: publisher figshare collection journal article supplement (https://gsapubs.figshare.com/ndownloader/files/23320190)
Supplement: Supplementary file 1 [file 23320190]

Pengfei Li, Min Sun, Gideon Rosenbaum, Keda Cai, Chao Yuan, Fred Jourdan, Xiaoping Xia, Yingde Jiang, and Yunying, Zhang, 2020, Tectonic evolution of the Chinese Tianshan Orogen from subduction to arc-continent collision: Insight from polyphase deformation along the Gangou section, Central Asia: GSA Bulletin, <https://doi.org/10.1130/B35353.1>.

## Data Repository

### Contents of this file

**Dataset DR1.** A simplified google earth-based structural and lithological map for Figure 7 and Figure 10.

**Figure DR1.** Color versions of photographs in Figures 5, 6, 8, 9, and 11.

**Table DR1.** SIMS U-Pb zircon and LA-ICP-MS monazite analyses for samples in the Chinese Tianshan Orogen (Gangou Section).

**Table DR2.**  $^{40}\text{Ar}/^{39}\text{Ar}$  step heating results for samples in the Chinese Tianshan orogen (Gangou Section).

### INTRODUCTION

This supporting material contains one google earth kmz file (Dataset DR1), one figure (Figure DR1) and two supplementary tables (Table DR1–DR2). Dataset DR1 shows a simplified google earth-based structural and lithological map, which is based on the satellite image interpretation and our field observations. This file is convenient for future researchers to use structural data reported in this contribution. Figure DR1 is a colour version of photographs presented in this paper. Tables DR1 and DR2 are geochronological data obtained in this study.
